# Supplementary material for: Probing the molecular interactions and physicochemical properties of a cobalt-based redox electrolyte system for thermo-electrochemical cells
Source: Royal Society of Chemistry journal article supplement (doi:10.1039/d2cp01149b), 2022-01-01
Supplement: d2cp01149b1.pdf [file d2cp01149b1.pdf]

## Supplementary information

### Contents

|   |                                                                                   |   |
|---|-----------------------------------------------------------------------------------|---|
| 1 | Diffusion measurements .....                                                      | 1 |
| 2 | Viscosity measurements .....                                                      | 3 |
| 3 | Ionic conductivity measurements .....                                             | 3 |
| 4 | Relaxation time measurements .....                                                | 3 |
| 5 | Walden Data .....                                                                 | 5 |
| 6 | Nernst–Einstein equation .....                                                    | 7 |
| 7 | Stokes-Einstein radii at 293 K and 353 K by changing the arbitrary constant. .... | 8 |

### 1 Diffusion measurements

Table 1: Diffusion coefficients of the (bpy)<sub>3</sub> molecules of Co<sup>2+</sup>(bpy)<sub>3</sub>(NTf<sub>2</sub>)<sub>2</sub> samples.  
Solvent is MPN.

| Samples<br>T (K) | Co <sup>2+</sup> (bpy) <sub>3</sub> (NTf <sub>2</sub> ) <sub>2</sub><br>D (×10 <sup>-10</sup> m <sup>2</sup> s <sup>-1</sup> ) |        |        |
|------------------|--------------------------------------------------------------------------------------------------------------------------------|--------|--------|
|                  | 0.05 M                                                                                                                         | 0.10 M | 0.15 M |
| 293              | 3.29                                                                                                                           | 2.89   | 2.71   |
| 303              | 4.04                                                                                                                           | 3.57   | 3.41   |
| 313              | 5.07                                                                                                                           | 4.40   | 4.25   |
| 323              | 6.23                                                                                                                           | 5.51   | 5.25   |
| 333              | 7.44                                                                                                                           | 6.82   | 6.40   |
| 343              | 9.02                                                                                                                           | 8.03   | 7.64   |
| 353              | 10.8                                                                                                                           | 9.66   | 9.25   |

Table 2: Diffusion coefficients of the (bpy)<sub>3</sub> molecules of Co<sup>3+</sup>(bpy)<sub>3</sub>(NTf<sub>2</sub>)<sub>3</sub> samples.  
Solvent is MPN.

| Samples<br>T (K) | Co <sup>3+</sup> (bpy) <sub>3</sub> (NTf <sub>2</sub> ) <sub>3</sub><br>D (×10 <sup>-10</sup> m <sup>2</sup> s <sup>-1</sup> ) |        |        |
|------------------|--------------------------------------------------------------------------------------------------------------------------------|--------|--------|
|                  | 0.05 M                                                                                                                         | 0.10 M | 0.15 M |
| 293              | 2.56                                                                                                                           | 2.26   | 1.89   |
| 303              | 3.27                                                                                                                           | 2.82   | 2.29   |
| 313              | 4.07                                                                                                                           | 3.54   | 2.90   |
| 323              | 5.06                                                                                                                           | 4.36   | 3.56   |
| 333              | 6.16                                                                                                                           | 5.35   | 4.37   |
| 343              | 7.22                                                                                                                           | 6.23   | 5.15   |
| 353              | 8.80                                                                                                                           | 7.33   | 6.26   |

Table 3: Diffusion coefficients of the (bpy)<sub>3</sub> molecules of Co<sup>2+/3+</sup>(bpy)<sub>3</sub>(NTf<sub>2</sub>)<sub>2/3</sub> samples. Solvent is MPN.

| Samples<br>T (K) | Co <sup>2+/3+</sup> (bpy) <sub>3</sub> (NTf <sub>2</sub> ) <sub>2/3</sub><br>D (×10 <sup>-10</sup> m <sup>2</sup> s <sup>-1</sup> ) |                                     |                                     |                                     |
|------------------|-------------------------------------------------------------------------------------------------------------------------------------|-------------------------------------|-------------------------------------|-------------------------------------|
|                  | 0.05 M                                                                                                                              |                                     | 0.10 M                              |                                     |
|                  | Co <sup>2+</sup> (bpy) <sub>3</sub>                                                                                                 | Co <sup>3+</sup> (bpy) <sub>3</sub> | Co <sup>2+</sup> (bpy) <sub>3</sub> | Co <sup>2+</sup> (bpy) <sub>3</sub> |
| 293              | 2.58                                                                                                                                | 2.32                                | 2.33                                | 1.99                                |
| 303              | 3.13                                                                                                                                | 2.99                                | 2.82                                | 2.41                                |
| 313              | 3.97                                                                                                                                | 3.72                                | 3.39                                | 2.96                                |
| 323              | 4.87                                                                                                                                | 4.46                                | 4.17                                | 3.66                                |
| 333              | 5.93                                                                                                                                | 5.44                                | 5.05                                | 4.56                                |
| 343              | 7.36                                                                                                                                | 6.31                                | 6.02                                | 5.36                                |
| 353              | 8.69                                                                                                                                | 7.45                                | 7.17                                | 6.36                                |

Table 4: Diffusion coefficients of the MPN molecules of all samples.

| Samples<br>T (K) | Co <sup>2+</sup> (bpy) <sub>3</sub> (NTf <sub>2</sub> ) <sub>2</sub><br>D (×10 <sup>-9</sup> m <sup>2</sup> s <sup>-1</sup> ) |        |        | Co <sup>3+</sup> (bpy) <sub>3</sub> (NTf <sub>2</sub> ) <sub>3</sub><br>D (×10 <sup>-9</sup> m <sup>2</sup> s <sup>-1</sup> ) |        |        | Co <sup>2+/3+</sup> (bpy) <sub>3</sub> (NTf <sub>2</sub> ) <sub>2/3</sub><br>D (×10 <sup>-9</sup> m <sup>2</sup> s <sup>-1</sup> ) |        |
|------------------|-------------------------------------------------------------------------------------------------------------------------------|--------|--------|-------------------------------------------------------------------------------------------------------------------------------|--------|--------|------------------------------------------------------------------------------------------------------------------------------------|--------|
|                  | 0.05 M                                                                                                                        | 0.10 M | 0.15 M | 0.05 M                                                                                                                        | 0.10 M | 0.15 M | 0.05 M                                                                                                                             | 0.10 M |
| 293              | 0.93                                                                                                                          | 0.87   | 0.81   | 0.90                                                                                                                          | 0.80   | 0.71   | 0.83                                                                                                                               | 0.72   |
| 303              | 1.16                                                                                                                          | 1.08   | 1.00   | 1.13                                                                                                                          | 1.01   | 8.89   | 1.04                                                                                                                               | 0.90   |
| 313              | 1.40                                                                                                                          | 1.31   | 1.25   | 1.37                                                                                                                          | 1.26   | 1.09   | 1.28                                                                                                                               | 1.11   |
| 323              | 1.69                                                                                                                          | 1.60   | 1.51   | 1.64                                                                                                                          | 1.51   | 1.33   | 1.54                                                                                                                               | 1.34   |
| 333              | 2.00                                                                                                                          | 1.89   | 1.80   | 1.95                                                                                                                          | 1.79   | 1.60   | 1.83                                                                                                                               | 1.61   |
| 343              | 2.35                                                                                                                          | 2.25   | 2.12   | 2.29                                                                                                                          | 2.12   | 1.87   | 2.15                                                                                                                               | 1.91   |
| 353              | 2.75                                                                                                                          | 2.57   | 2.48   | 2.63                                                                                                                          | 2.44   | 2.17   | 2.47                                                                                                                               | 2.21   |

Table 5: Diffusion coefficients of the NTf<sub>2</sub> molecules of all samples.

| Samples<br>T (K) | Co <sup>2+</sup> (bpy) <sub>3</sub> (NTf <sub>2</sub> ) <sub>2</sub><br>D (×10 <sup>-10</sup> m <sup>2</sup> s <sup>-1</sup> ) |        |        | Co <sup>3+</sup> (bpy) <sub>3</sub> (NTf <sub>2</sub> ) <sub>3</sub><br>D (×10 <sup>-10</sup> m <sup>2</sup> s <sup>-1</sup> ) |        |        | Co <sup>2+/3+</sup> (bpy) <sub>3</sub> (NTf <sub>2</sub> ) <sub>2/3</sub><br>D (×10 <sup>-10</sup> m <sup>2</sup> s <sup>-1</sup> ) |        |
|------------------|--------------------------------------------------------------------------------------------------------------------------------|--------|--------|--------------------------------------------------------------------------------------------------------------------------------|--------|--------|-------------------------------------------------------------------------------------------------------------------------------------|--------|
|                  | 0.05 M                                                                                                                         | 0.10 M | 0.15 M | 0.05 M                                                                                                                         | 0.10 M | 0.15 M | 0.05 M                                                                                                                              | 0.10 M |
| 293              | 4.05                                                                                                                           | 3.86   | 3.37   | 3.74                                                                                                                           | 3.02   | 2.68   | 3.26                                                                                                                                | 2.75   |
| 303              | 4.75                                                                                                                           | 4.55   | 4.13   | 4.52                                                                                                                           | 3.87   | 3.35   | 4.03                                                                                                                                | 3.42   |
| 313              | 6.08                                                                                                                           | 5.70   | 5.01   | 5.54                                                                                                                           | 4.78   | 4.06   | 5.15                                                                                                                                | 4.33   |
| 323              | 7.32                                                                                                                           | 6.68   | 6.10   | 6.53                                                                                                                           | 5.79   | 5.06   | 6.14                                                                                                                                | 5.11   |
| 333              | 8.59                                                                                                                           | 8.10   | 7.33   | 7.78                                                                                                                           | 6.98   | 6.07   | 7.33                                                                                                                                | 6.24   |
| 343              | 1.02                                                                                                                           | 9.31   | 8.65   | 9.11                                                                                                                           | 8.17   | 7.08   | 8.54                                                                                                                                | 7.26   |
| 353              | 1.14                                                                                                                           | 1.09   | 9.87   | 10.20                                                                                                                          | 9.49   | 8.37   | 9.61                                                                                                                                | 8.53   |

## 2 Viscosity measurements

Table 6: Viscosities of the liquid electrolytes.

| Samples<br>T (K) | $\text{Co}^{2+}(\text{bpy})_3(\text{NTf}_2)_2$<br>$\eta$ (mPa s) |               |               | $\text{Co}^{3+}(\text{bpy})_3(\text{NTf}_2)_3$<br>$\eta$ (mPa s) |               |               | $\text{Co}^{2+/3+}(\text{bpy})_3(\text{NTf}_2)_{2/3}$<br>$\eta$ (mPa s) |               |
|------------------|------------------------------------------------------------------|---------------|---------------|------------------------------------------------------------------|---------------|---------------|-------------------------------------------------------------------------|---------------|
|                  | <i>0.05 M</i>                                                    | <i>0.10 M</i> | <i>0.15 M</i> | <i>0.05 M</i>                                                    | <i>0.10 M</i> | <i>0.15 M</i> | <i>0.05 M</i>                                                           | <i>0.10 M</i> |
| 293              | 1.31                                                             | 1.47          | 1.62          | 1.39                                                             | 1.66          | 1.92          | 1.57                                                                    | 2.20          |
| 303              | 1.11                                                             | 1.24          | 1.36          | 1.17                                                             | 1.40          | 1.60          | 1.32                                                                    | 1.82          |
| 313              | 0.95                                                             | 1.07          | 1.16          | 1.02                                                             | 1.20          | 1.36          | 1.13                                                                    | 1.54          |
| 323              | 0.83                                                             | 0.93          | 1.01          | 0.89                                                             | 1.04          | 1.17          | 0.99                                                                    | 1.32          |
| 333              | 0.74                                                             | 0.82          | 0.89          | 0.79                                                             | 0.92          | 1.03          | 0.87                                                                    | 1.16          |
| 343              | 0.66                                                             | 0.74          | 0.79          | 0.71                                                             | 0.82          | 0.91          | 0.78                                                                    | 1.04          |
| 353              | 0.59                                                             | 0.66          | 0.70          | 0.63                                                             | 0.74          | 0.81          | 0.70                                                                    | 0.94          |

## 3 Ionic conductivity measurements

Table 7: Ionic conductivities of the liquid electrolytes.

| Samples<br>T (K) | $\text{Co}^{2+}(\text{bpy})_3(\text{NTf}_2)_2$<br>$\sigma$ ( $\times 10^{-3}$ S $\text{cm}^{-1}$ ) |               |               | $\text{Co}^{3+}(\text{bpy})_3(\text{NTf}_2)_3$<br>$\sigma$ ( $\times 10^{-3}$ S $\text{cm}^{-1}$ ) |               |               | $\text{Co}^{2+/3+}(\text{bpy})_3(\text{NTf}_2)_{2/3}$<br>$\sigma$ ( $\times 10^{-3}$ S $\text{cm}^{-1}$ ) |               |
|------------------|----------------------------------------------------------------------------------------------------|---------------|---------------|----------------------------------------------------------------------------------------------------|---------------|---------------|-----------------------------------------------------------------------------------------------------------|---------------|
|                  | <i>0.05 M</i>                                                                                      | <i>0.10 M</i> | <i>0.15 M</i> | <i>0.05 M</i>                                                                                      | <i>0.10 M</i> | <i>0.15 M</i> | <i>0.05 M</i>                                                                                             | <i>0.10 M</i> |
| 293              | 2.26                                                                                               | 3.78          | 4.64          | 2.90                                                                                               | 4.54          | 5.40          | 4.05                                                                                                      | 5.61          |
| 303              | 2.61                                                                                               | 4.37          | 5.43          | 3.33                                                                                               | 5.27          | 6.31          | 4.71                                                                                                      | 6.57          |
| 313              | 2.96                                                                                               | 4.96          | 6.22          | 3.75                                                                                               | 5.96          | 7.18          | 5.34                                                                                                      | 7.58          |
| 323              | 3.30                                                                                               | 5.54          | 6.85          | 4.15                                                                                               | 6.60          | 8.06          | 5.96                                                                                                      | 8.59          |
| 333              | 3.62                                                                                               | 6.17          | 7.67          | 4.52                                                                                               | 7.23          | 8.88          | 6.57                                                                                                      | 9.52          |
| 343              | 4.00                                                                                               | 6.75          | 8.35          | 4.88                                                                                               | 7.83          | 9.80          | 7.14                                                                                                      | 10.40         |
| 353              | 4.30                                                                                               | 7.32          | 9.05          | 5.21                                                                                               | 8.38          | 10.49         | 7.70                                                                                                      | 11.34         |

## 4 Relaxation time measurements

Table 8:  $^1\text{H}$  NMR  $T_1$  relaxation times of the MPN protons.

| Samples<br>T (K) | $\text{Co}^{2+}(\text{bpy})_3(\text{NTf}_2)_2$<br>$T_1$ (ms) |               |               | $\text{Co}^{3+}(\text{bpy})_3(\text{NTf}_2)_3$<br>$T_1$ (ms) |               |               | $\text{Co}^{2+/3+}(\text{bpy})_3(\text{NTf}_2)_{2/3}$<br>$T_1$ (ms) |               | Pure<br>MPN<br>$T_1$ (ms) |
|------------------|--------------------------------------------------------------|---------------|---------------|--------------------------------------------------------------|---------------|---------------|---------------------------------------------------------------------|---------------|---------------------------|
|                  | <i>0.05 M</i>                                                | <i>0.10 M</i> | <i>0.15 M</i> | <i>0.05 M</i>                                                | <i>0.10 M</i> | <i>0.15 M</i> | <i>0.05 M</i>                                                       | <i>0.10 M</i> |                           |
| 293              | 1120                                                         | 751           | 590           | 3862                                                         | 3205          | 2750          | 989                                                                 | 880           | 2843                      |
| 303              | 1226                                                         | 818           | 655           | 4621                                                         | 3648          | 3201          | 1137                                                                | 1022          | 3318                      |
| 313              | 1513                                                         | 950           | 719           | 5372                                                         | 4265          | 3631          | 1260                                                                | 1078          | 3770                      |
| 323              | 1610                                                         | 1010          | 785           | 6110                                                         | 4879          | 4166          | 1384                                                                | 1288          | 4282                      |
| 333              | 1853                                                         | 1149          | 869           | 7002                                                         | 5924          | 4799          | 1533                                                                | 1428          | 4910                      |
| 343              | 1984                                                         | 1254          | 964           | 7772                                                         | 6778          | 5718          | 1716                                                                | 1608          | 5520                      |
| 353              | 2262                                                         | 1386          | 1031          | 8608                                                         | 7375          | 6409          | 1903                                                                | 1657          | 6173                      |

Table 9:  $^{19}\text{F}$  NMR  $T_1$  relaxations measured from the  $\text{NTf}_2^-$  anions.

| Samples | $\text{Co}^{2+}(\text{bpy})_3(\text{NTf}_2)_2$ |               |               | $\text{Co}^{3+}(\text{bpy})_3(\text{NTf}_2)_3$ |               |               | $\text{Co}^{2+/3+}(\text{bpy})_3(\text{NTf}_2)_{2/3}$ |               |
|---------|------------------------------------------------|---------------|---------------|------------------------------------------------|---------------|---------------|-------------------------------------------------------|---------------|
|         | $T_1$ (ms)                                     |               |               | $T_1$ (ms)                                     |               |               | $T_1$ (ms)                                            |               |
|         | <i>0.05 M</i>                                  | <i>0.10 M</i> | <i>0.15 M</i> | <i>0.05 M</i>                                  | <i>0.10 M</i> | <i>0.15 M</i> | <i>0.05 M</i>                                         | <i>0.10 M</i> |
| 293     | 675                                            | 484           | 423           | 2535                                           | 2287          | 2056          | 774                                                   | 587           |
| 303     | 766                                            | 543           | 470           | 3137                                           | 2818          | 2304          | 867                                                   | 677           |
| 313     | 834                                            | 603           | 510           | 3499                                           | 3175          | 2687          | 962                                                   | 741           |
| 323     | 916                                            | 655           | 542           | 4015                                           | 3486          | 2974          | 1051                                                  | 809           |
| 333     | 966                                            | 704           | 588           | 4229                                           | 3748          | 3232          | 1145                                                  | 897           |
| 343     | 1055                                           | 753           | 639           | 4418                                           | 4066          | 3544          | 1239                                                  | 960           |
| 353     | 1115                                           | 799           | 680           | 4801                                           | 4396          | 3648          | 1335                                                  | 1040          |

Table 10:  $^1\text{H}$   $T_1$  values of the  $(\text{bpy})_3$  protons of the 0.05 M  $\text{Co}^{3+}(\text{bpy})_3(\text{NTf}_2)_3$  and 0.05 M  $\text{Co}^{2+}(\text{bpy})_3(\text{NTf}_2)_2$  samples.

| Samples | $\text{Co}^{2+}(\text{bpy})_3(\text{NTf}_2)_2$ |       |       |       | $\text{Co}^{3+}(\text{bpy})_3(\text{NTf}_2)_3$ |         |         |         |
|---------|------------------------------------------------|-------|-------|-------|------------------------------------------------|---------|---------|---------|
|         | $T_1$ (ms)                                     |       |       |       | $T_1$ (ms)                                     |         |         |         |
|         | $H_1$                                          | $H_2$ | $H_3$ | $H_4$ | $H_1$                                          | $H_2$   | $H_3$   | $H_4$   |
| 293     | 16.84                                          | 38.08 | 25.79 | 1.38  | 880.20                                         | 1366.00 | 1316.01 | 1325.01 |
| 303     | 21.95                                          | 49.37 | 29.61 | 1.67  | 925.08                                         | 1470.01 | 1407.99 | 1426.00 |
| 313     | 25.27                                          | 48.16 | 32.83 | 1.85  | 989.85                                         | 1610.02 | 1498.99 | 1527.99 |
| 323     | 28.61                                          | 56.92 | 36.42 | 1.99  | 1044.00                                        | 1716.01 | 1585.99 | 1611.02 |
| 333     | 31.09                                          | 62.05 | 40.53 | 2.24  | 1094.99                                        | 1822.01 | 1680.00 | 1708.99 |
| 343     | 35.92                                          | 61.31 | 44.61 | 2.58  | 1145.99                                        | 1915.01 | 1783.98 | 1823.01 |
| 353     | 39.89                                          | 72.31 | 48.46 | 2.82  | 1269.99                                        | 2109.02 | 2009.00 | 2037.00 |

Table 11:  $^{19}\text{F}$  NMR  $T_2$  relaxations measured from the  $\text{NTf}_2^-$  anions

| Samples | $\text{Co}^{2+}(\text{bpy})_3(\text{NTf}_2)_2$ |               |               | $\text{Co}^{3+}(\text{bpy})_3(\text{NTf}_2)_3$ |               |               | $\text{Co}^{2+/3+}(\text{bpy})_3(\text{NTf}_2)_{2/3}$ |               |
|---------|------------------------------------------------|---------------|---------------|------------------------------------------------|---------------|---------------|-------------------------------------------------------|---------------|
|         | $T_2$ (ms)                                     |               |               | $T_2$ (ms)                                     |               |               | $T_2$ (ms)                                            |               |
|         | <i>0.05 M</i>                                  | <i>0.10 M</i> | <i>0.15 M</i> | <i>0.05 M</i>                                  | <i>0.10 M</i> | <i>0.15 M</i> | <i>0.05 M</i>                                         | <i>0.10 M</i> |
| 293     | 487                                            | 306           | 303           | 1783                                           | 1650          | 1255          | 527                                                   | 314           |
| 303     | 549                                            | 347           | 331           | 1991                                           | 1788          | 1500          | 596                                                   | 369           |
| 313     | 611                                            | 387           | 360           | 2116                                           | 1867          | 1761          | 654                                                   | 407           |
| 323     | 646                                            | 428           | 395           | 2181                                           | 2225          | 1923          | 702                                                   | 456           |
| 333     | 683                                            | 449           | 413           | 1985                                           | 2488          | 2196          | 743                                                   | 477           |
| 343     | 679                                            | 462           | 420           | 1661                                           | 1962          | 1726          | 758                                                   | 502           |
| 353     | 682                                            | 464           | 430           | 1558                                           | 1720          | 1498          | 775                                                   | 513           |

## 5 Walden Data

Table 12: Molar conductivities of the liquid electrolytes.

| Samples<br>T (K) | $\text{Co}^{2+}(\text{bpy})_3(\text{NTf}_2)_2$<br>$\Lambda_m$ (S cm <sup>2</sup> mol <sup>-1</sup> ) |               |               | $\text{Co}^{3+}(\text{bpy})_3(\text{NTf}_2)_3$<br>$\Lambda_m$ (S cm <sup>2</sup> mol <sup>-1</sup> ) |               |               | $\text{Co}^{2+/3+}(\text{bpy})_3(\text{NTf}_2)_{2/3}$<br>$\Lambda_m$ (S cm <sup>2</sup> mol <sup>-1</sup> ) |               |
|------------------|------------------------------------------------------------------------------------------------------|---------------|---------------|------------------------------------------------------------------------------------------------------|---------------|---------------|-------------------------------------------------------------------------------------------------------------|---------------|
|                  | <i>0.05 M</i>                                                                                        | <i>0.10 M</i> | <i>0.15 M</i> | <i>0.05 M</i>                                                                                        | <i>0.10 M</i> | <i>0.15 M</i> | <i>0.05 M</i>                                                                                               | <i>0.10 M</i> |
| 293              | 45.12                                                                                                | 37.81         | 30.93         | 58.04                                                                                                | 45.42         | 36.01         | 40.53                                                                                                       | 28.03         |
| 303              | 52.11                                                                                                | 43.66         | 36.17         | 66.69                                                                                                | 52.69         | 42.04         | 47.14                                                                                                       | 32.84         |
| 313              | 59.13                                                                                                | 49.60         | 41.49         | 74.91                                                                                                | 59.57         | 47.90         | 53.40                                                                                                       | 37.88         |
| 323              | 65.95                                                                                                | 55.40         | 45.68         | 82.90                                                                                                | 66.04         | 53.76         | 59.57                                                                                                       | 42.95         |
| 333              | 72.40                                                                                                | 61.74         | 51.15         | 90.32                                                                                                | 72.29         | 59.20         | 65.68                                                                                                       | 47.61         |
| 343              | 79.97                                                                                                | 67.55         | 55.66         | 97.57                                                                                                | 78.25         | 65.32         | 71.42                                                                                                       | 52.00         |
| 353              | 86.06                                                                                                | 73.18         | 60.33         | 104.22                                                                                               | 83.78         | 69.94         | 76.98                                                                                                       | 56.72         |

Table 13: Inverse viscosities of the liquid electrolytes.

| Samples<br>T (K) | $\text{Co}^{2+}(\text{bpy})_3(\text{NTf}_2)_2$<br>$\eta^{-1}$ (P <sup>-1</sup> ) |               |               | $\text{Co}^{3+}(\text{bpy})_3(\text{NTf}_2)_3$<br>$\eta^{-1}$ (P <sup>-1</sup> ) |               |               | $\text{Co}^{2+/3+}(\text{bpy})_3(\text{NTf}_2)_{2/3}$<br>$\eta^{-1}$ (P <sup>-1</sup> ) |               |
|------------------|----------------------------------------------------------------------------------|---------------|---------------|----------------------------------------------------------------------------------|---------------|---------------|-----------------------------------------------------------------------------------------|---------------|
|                  | <i>0.05 M</i>                                                                    | <i>0.10 M</i> | <i>0.15 M</i> | <i>0.05 M</i>                                                                    | <i>0.10 M</i> | <i>0.15 M</i> | <i>0.05 M</i>                                                                           | <i>0.10 M</i> |
| 293              | 76.63                                                                            | 67.89         | 61.65         | 72.05                                                                            | 60.20         | 52.08         | 63.68                                                                                   | 45.41         |
| 303              | 90.33                                                                            | 80.52         | 73.42         | 85.18                                                                            | 71.68         | 62.62         | 75.75                                                                                   | 54.92         |
| 313              | 104.82                                                                           | 93.81         | 86.13         | 98.04                                                                            | 83.61         | 73.58         | 88.32                                                                                   | 65.04         |
| 323              | 119.90                                                                           | 107.64        | 99.30         | 112.74                                                                           | 95.79         | 85.18         | 101.50                                                                                  | 75.49         |
| 333              | 135.87                                                                           | 122.70        | 112.99        | 127.06                                                                           | 108.34        | 97.47         | 114.84                                                                                  | 86.03         |
| 343              | 152.21                                                                           | 135.69        | 127.39        | 141.84                                                                           | 122.10        | 110.25        | 128.87                                                                                  | 96.19         |
| 353              | 168.92                                                                           | 151.52        | 142.25        | 158.23                                                                           | 136.05        | 123.15        | 143.12                                                                                  | 106.87        |

Table 14: Walden product of the liquid electrolytes.

| Samples<br>T (K) | $\text{Co}^{2+}(\text{bpy})_3(\text{NTf}_2)_2$<br>$\Lambda_m \cdot \eta$ (S cm <sup>2</sup> mol <sup>-1</sup> Pa s) |               |               | $\text{Co}^{3+}(\text{bpy})_3(\text{NTf}_2)_3$<br>$\Lambda_m \cdot \eta$ (S cm <sup>2</sup> mol <sup>-1</sup> Pa s) |               |               | $\text{Co}^{2+/3+}(\text{bpy})_3(\text{NTf}_2)_{2/3}$<br>$\Lambda_m \cdot \eta$ (S cm <sup>2</sup> mol <sup>-1</sup> Pa s) |               |
|------------------|---------------------------------------------------------------------------------------------------------------------|---------------|---------------|---------------------------------------------------------------------------------------------------------------------|---------------|---------------|----------------------------------------------------------------------------------------------------------------------------|---------------|
|                  | <i>0.05 M</i>                                                                                                       | <i>0.10 M</i> | <i>0.15 M</i> | <i>0.05 M</i>                                                                                                       | <i>0.10 M</i> | <i>0.15 M</i> | <i>0.05 M</i>                                                                                                              | <i>0.10 M</i> |
| 293              | 0.05888                                                                                                             | 0.0557        | 0.05017       | 0.08056                                                                                                             | 0.07545       | 0.06913       | 0.06365                                                                                                                    | 0.06171       |
| 303              | 0.05769                                                                                                             | 0.05423       | 0.04926       | 0.0783                                                                                                              | 0.0735        | 0.06714       | 0.06223                                                                                                                    | 0.05979       |
| 313              | 0.05641                                                                                                             | 0.05288       | 0.04817       | 0.07641                                                                                                             | 0.07125       | 0.06509       | 0.06047                                                                                                                    | 0.05824       |
| 323              | 0.055                                                                                                               | 0.05146       | 0.046         | 0.07353                                                                                                             | 0.06895       | 0.06312       | 0.05869                                                                                                                    | 0.0569        |
| 333              | 0.05328                                                                                                             | 0.05032       | 0.04527       | 0.07108                                                                                                             | 0.06672       | 0.06074       | 0.05719                                                                                                                    | 0.05534       |
| 343              | 0.05254                                                                                                             | 0.04978       | 0.04369       | 0.06879                                                                                                             | 0.06409       | 0.05924       | 0.05542                                                                                                                    | 0.05405       |
| 353              | 0.05095                                                                                                             | 0.0483        | 0.04241       | 0.06587                                                                                                             | 0.06158       | 0.05679       | 0.05379                                                                                                                    | 0.05308       |

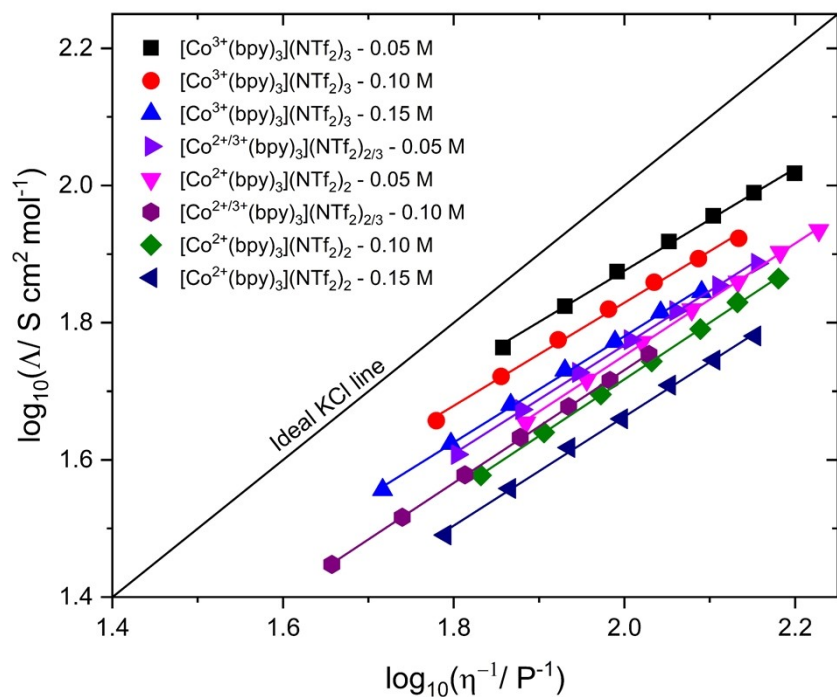

Figure 1: Walden plots for liquid electrolytes.

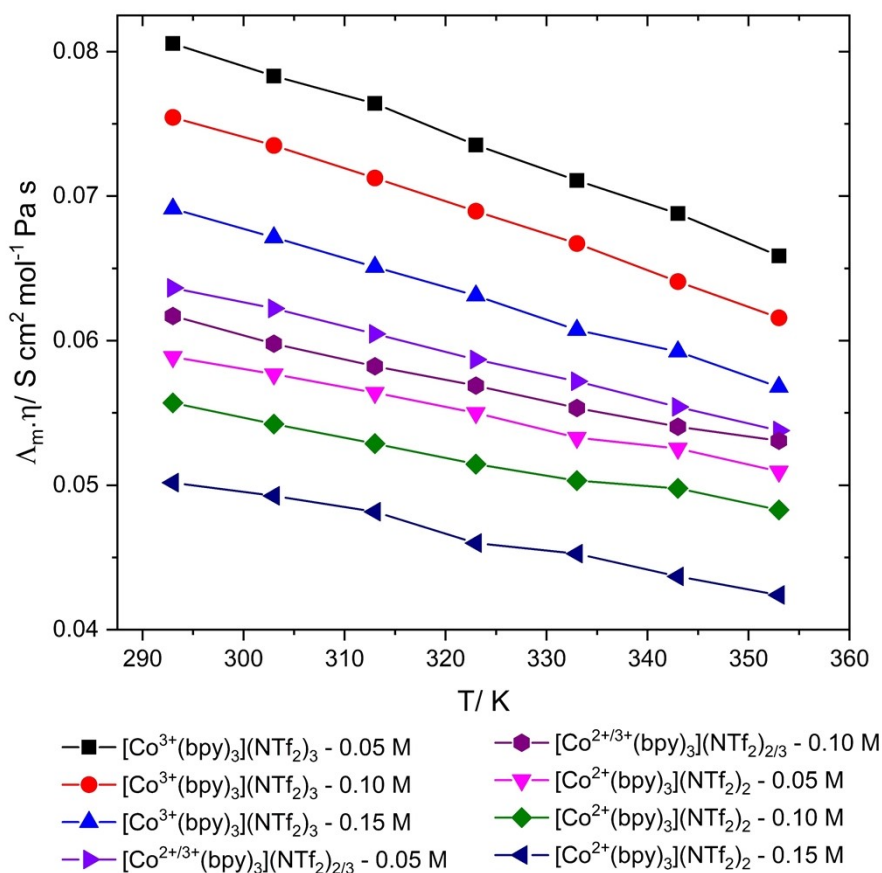

Figure 2: The temperature dependence of the Walden products of the liquid electrolytes.

## 6 Nernst–Einstein equation

The experimental molar conductivity  $\Lambda_{exp}$  and the molar conductivity calculated from the Nernst–Einstein equation ( $\Lambda_{NE}$ ) are compared:

$$\Lambda_{NE} = \frac{F^2}{RT} (z_i^2 D_i)$$

$$\Lambda_{NE} = \frac{F^2}{RT} (z_{cation}^2 D^+ + z_{anion}^2 D^-)$$

$D^+$  = diffusion coefficients of  $\text{Co}^{2+}(\text{bpy})_3$  or  $\text{Co}^{3+}(\text{bpy})_3$

$D^-$  = diffusion coefficient of  $\text{NTf}_2^-$

Table 15:  $\Lambda_{exp}$  and  $\Lambda_{NE}$  values of  $\text{Co}^{2+}(\text{bpy})_3(\text{NTf}_2)_2$  samples.

| Temperature (K) | $\text{Co}^{2+}(\text{bpy})_3(\text{NTf}_2)_2$ -0.05 M |                | $\text{Co}^{2+}(\text{bpy})_3(\text{NTf}_2)_2$ -0.10 M |                | $\text{Co}^{2+}(\text{bpy})_3(\text{NTf}_2)_2$ -0.15 M |                |
|-----------------|--------------------------------------------------------|----------------|--------------------------------------------------------|----------------|--------------------------------------------------------|----------------|
|                 | $\Lambda_{exp}$                                        | $\Lambda_{NE}$ | $\Lambda_{exp}$                                        | $\Lambda_{NE}$ | $\Lambda_{exp}$                                        | $\Lambda_{NE}$ |
| 293             | 45.12                                                  | 65.77          | 37.81                                                  | 58.94          | 30.93                                                  | 54.27          |
| 303             | 52.11                                                  | 77.26          | 43.66                                                  | 69.58          | 36.17                                                  | 65.58          |
| 313             | 59.13                                                  | 94.32          | 49.60                                                  | 83.31          | 41.49                                                  | 78.65          |
| 323             | 65.95                                                  | 111.80         | 55.40                                                  | 99.50          | 45.68                                                  | 93.97          |
| 333             | 72.40                                                  | 128.93         | 61.74                                                  | 118.90         | 51.15                                                  | 110.74         |
| 343             | 80.00                                                  | 150.93         | 67.55                                                  | 135.31         | 55.66                                                  | 127.99         |
| 353             | 86.06                                                  | 172.52         | 73.18                                                  | 156.98         | 60.33                                                  | 148.72         |

Table 16:  $\Lambda_{exp}$  and  $\Lambda_{NE}$  values of  $\text{Co}^{3+}(\text{bpy})_3(\text{NTf}_2)_3$  samples.

| Temperature (K) | $\text{Co}^{3+}(\text{bpy})_3(\text{NTf}_2)_3$ -0.05 M |                | $\text{Co}^{3+}(\text{bpy})_3(\text{NTf}_2)_3$ -0.10 M |                | $\text{Co}^{3+}(\text{bpy})_3(\text{NTf}_2)_3$ -0.15 M |                |
|-----------------|--------------------------------------------------------|----------------|--------------------------------------------------------|----------------|--------------------------------------------------------|----------------|
|                 | $\Lambda_{exp}$                                        | $\Lambda_{NE}$ | $\Lambda_{exp}$                                        | $\Lambda_{NE}$ | $\Lambda_{exp}$                                        | $\Lambda_{NE}$ |
| 293             | 58.04                                                  | 102.29         | 45.42                                                  | 89.24          | 36.01                                                  | 75.30          |
| 303             | 66.69                                                  | 125.41         | 52.69                                                  | 108.19         | 42.04                                                  | 88.41          |
| 313             | 74.91                                                  | 150.92         | 59.57                                                  | 131.15         | 47.90                                                  | 108.02         |
| 323             | 82.90                                                  | 180.62         | 66.04                                                  | 156.09         | 53.76                                                  | 128.73         |
| 333             | 90.32                                                  | 212.59         | 72.29                                                  | 185.34         | 59.20                                                  | 152.78         |
| 343             | 97.57                                                  | 241.78         | 78.25                                                  | 209.65         | 65.32                                                  | 174.38         |
| 353             | 104.22                                                 | 283.77         | 83.78                                                  | 239.45         | 69.94                                                  | 205.28         |

Table 17:  $\Lambda_{exp}$  and  $\Lambda_{NE}$  values of  $Co^{2+/3+}(bpy)_3(NTf_2)_{2/3}$  samples.

| Temperature (K) | $Co^{2+/3+}(bpy)_3(NTf_2)_{2/3}$ - 0.05 M |                | $Co^{2+/3+}(bpy)_3(NTf_2)_{2/3}$ - 0.10 M |                |
|-----------------|-------------------------------------------|----------------|-------------------------------------------|----------------|
|                 | $\Lambda_{exp}$                           | $\Lambda_{NE}$ | $\Lambda_{exp}$                           | $\Lambda_{NE}$ |
| 293             | 40.53                                     | 131.66         | 28.03                                     | 114.54         |
| 303             | 47.14                                     | 160.71         | 32.84                                     | 134.64         |
| 313             | 53.40                                     | 194.92         | 37.88                                     | 159.23         |
| 323             | 59.57                                     | 227.82         | 42.95                                     | 189.67         |
| 333             | 65.68                                     | 268.92         | 47.61                                     | 226.72         |
| 343             | 71.42                                     | 309.35         | 52.00                                     | 259.60         |
| 353             | 76.98                                     | 353.37         | 56.72                                     | 299.51         |

## 7 Stokes-Einstein radii at 293 K and 353 K by changing the arbitrary constant.

In the Stokes-Einstein equation, the constant may also be varied depending on systems studied. The constant was reported to 3~4 for organic electrolyte solutions. Various arbitrary constants were used to understand which one was better for ion radius calculations.

$$R_H = \frac{k_B T}{c\pi\eta D}$$

Table 18: Stokes-Einstein radii at 293 K and 353 K with constant, 6.

| Sample                                  | $R_H (NTf_2^-)$<br>( $\times 10^{-10}$ m) |       | $R_H ([Co(bpy)_3]^{2+})$<br>( $\times 10^{-10}$ m) |       | $R_H ([Co(bpy)_3]^{3+})$<br>( $\times 10^{-10}$ m) |       |
|-----------------------------------------|-------------------------------------------|-------|----------------------------------------------------|-------|----------------------------------------------------|-------|
|                                         | 293 K                                     | 353 K | 293 K                                              | 353 K | 293 K                                              | 353 K |
| $Co^{2+}(bpy)_3(NTf_2)_2$ 0.05 M        | 4.1                                       | 3.8   | 5.0                                                | 4.1   | -                                                  | -     |
| $Co^{2+}(bpy)_3(NTf_2)_2$ 0.10 M        | 3.8                                       | 3.6   | 5.0                                                | 4.1   | -                                                  | -     |
| $Co^{2+}(bpy)_3(NTf_2)_2$ 0.15 M        | 3.9                                       | 3.7   | 4.9                                                | 4.0   | -                                                  | -     |
| $Co^{3+}(bpy)_3(NTf_2)_3$ 0.05 M        | 4.1                                       | 4.0   | -                                                  | -     | 6.0                                                | 4.7   |
| $Co^{3+}(bpy)_3(NTf_2)_3$ 0.10 M        | 4.3                                       | 3.7   | -                                                  | -     | 5.7                                                | 4.8   |
| $Co^{3+}(bpy)_3(NTf_2)_3$ 0.15 M        | 4.2                                       | 3.8   | -                                                  | -     | 5.9                                                | 5.1   |
| $Co^{2+/3+}(bpy)_3(NTf_2)_{2/3}$ 0.05 M | 4.2                                       | 3.9   | 5.3                                                | 4.3   | 5.9                                                | 5.0   |
| $Co^{2+/3+}(bpy)_3(NTf_2)_{2/3}$ 0.10 M | 3.6                                       | 3.2   | 4.2                                                | 3.9   | 4.9                                                | 4.3   |



Table 19: Stokes-Einstein radii at 293 K and 353 K with constant, 5.

| Sample                                                                           | $R_H$ (NTf <sub>2</sub> <sup>-</sup> )<br>( $\times 10^{-10}$ m) |       | $R_H$ ([Co(bpy) <sub>3</sub> ] <sup>2+</sup> )<br>( $\times 10^{-10}$ m) |       | $R_H$ ([Co(bpy) <sub>3</sub> ] <sup>3+</sup> )<br>( $\times 10^{-10}$ m) |       |
|----------------------------------------------------------------------------------|------------------------------------------------------------------|-------|--------------------------------------------------------------------------|-------|--------------------------------------------------------------------------|-------|
|                                                                                  | 293 K                                                            | 353 K | 293 K                                                                    | 353 K | 293 K                                                                    | 353 K |
| Co <sup>2+</sup> (bpy) <sub>3</sub> (NTf <sub>2</sub> ) <sub>2</sub> 0.05 M      | 4.9                                                              | 4.6   | 6.0                                                                      | 4.9   | -                                                                        | -     |
| Co <sup>2+</sup> (bpy) <sub>3</sub> (NTf <sub>2</sub> ) <sub>2</sub> 0.10 M      | 4.5                                                              | 4.3   | 6.1                                                                      | 4.9   | -                                                                        | -     |
| Co <sup>2+</sup> (bpy) <sub>3</sub> (NTf <sub>2</sub> ) <sub>2</sub> 0.15 M      | 4.7                                                              | 4.7   | 5.9                                                                      | 4.8   | -                                                                        | -     |
| Co <sup>3+</sup> (bpy) <sub>3</sub> (NTf <sub>2</sub> ) <sub>3</sub> 0.05 M      | 5.0                                                              | 4.8   | -                                                                        | -     | 7.2                                                                      | 5.6   |
| Co <sup>3+</sup> (bpy) <sub>3</sub> (NTf <sub>2</sub> ) <sub>3</sub> 0.10 M      | 5.1                                                              | 4.5   | -                                                                        | -     | 6.9                                                                      | 5.8   |
| Co <sup>3+</sup> (bpy) <sub>3</sub> (NTf <sub>2</sub> ) <sub>3</sub> 0.15 M      | 5.0                                                              | 4.6   | -                                                                        | -     | 7.1                                                                      | 6.1   |
| Co <sup>2+/3+</sup> (bpy) <sub>3</sub> (NTf <sub>2</sub> ) <sub>2/3</sub> 0.05 M | 5.0                                                              | 4.6   | 6.4                                                                      | 5.1   | 7.1                                                                      | 6.0   |
| Co <sup>2+/3+</sup> (bpy) <sub>3</sub> (NTf <sub>2</sub> ) <sub>2/3</sub> 0.10 M | 4.3                                                              | 3.9   | 5.0                                                                      | 4.6   | 5.9                                                                      | 5.2   |

Table 20: Stokes-Einstein radii at 293 K and 353 K with constant, 4.

| Sample                                                                           | $R_H$ (NTf <sub>2</sub> <sup>-</sup> )<br>( $\times 10^{-10}$ m) |       | $R_H$ ([Co(bpy) <sub>3</sub> ] <sup>2+</sup> )<br>( $\times 10^{-10}$ m) |       | $R_H$ ([Co(bpy) <sub>3</sub> ] <sup>3+</sup> )<br>( $\times 10^{-10}$ m) |       |
|----------------------------------------------------------------------------------|------------------------------------------------------------------|-------|--------------------------------------------------------------------------|-------|--------------------------------------------------------------------------|-------|
|                                                                                  | 293 K                                                            | 353 K | 293 K                                                                    | 353 K | 293 K                                                                    | 353 K |
| Co <sup>2+</sup> (bpy) <sub>3</sub> (NTf <sub>2</sub> ) <sub>2</sub> 0.05 M      | 6.1                                                              | 5.7   | 7.5                                                                      | 6.1   | -                                                                        | -     |
| Co <sup>2+</sup> (bpy) <sub>3</sub> (NTf <sub>2</sub> ) <sub>2</sub> 0.10 M      | 5.7                                                              | 5.4   | 7.6                                                                      | 6.1   | -                                                                        | -     |
| Co <sup>2+</sup> (bpy) <sub>3</sub> (NTf <sub>2</sub> ) <sub>2</sub> 0.15 M      | 5.9                                                              | 5.6   | 7.3                                                                      | 6.0   | -                                                                        | -     |
| Co <sup>3+</sup> (bpy) <sub>3</sub> (NTf <sub>2</sub> ) <sub>3</sub> 0.05 M      | 6.2                                                              | 6.0   | -                                                                        | -     | 9.1                                                                      | 7.0   |
| Co <sup>3+</sup> (bpy) <sub>3</sub> (NTf <sub>2</sub> ) <sub>3</sub> 0.10 M      | 6.4                                                              | 5.6   | -                                                                        | -     | 8.6                                                                      | 7.2   |
| Co <sup>3+</sup> (bpy) <sub>3</sub> (NTf <sub>2</sub> ) <sub>3</sub> 0.15 M      | 6.3                                                              | 5.7   | -                                                                        | -     | 8.9                                                                      | 7.6   |
| Co <sup>2+/3+</sup> (bpy) <sub>3</sub> (NTf <sub>2</sub> ) <sub>2/3</sub> 0.05 M | 6.3                                                              | 5.8   | 7.9                                                                      | 6.4   | 8.8                                                                      | 7.5   |
| Co <sup>2+/3+</sup> (bpy) <sub>3</sub> (NTf <sub>2</sub> ) <sub>2/3</sub> 0.10 M | 5.3                                                              | 4.9   | 6.3                                                                      | 5.8   | 7.4                                                                      | 6.5   |
